# Supplementary material for: Synthesis and thermal reactivity of organoscandium and yttrium complexes of sterically less bulky salicylaldiminato ligandsElectronic supplementary information (ESI) available: Further experimental details. See http://www.rsc.org/suppdata/dt/b3/b303097k/
Source: Royal Society of Chemistry journal article supplement (doi:10.1039/b303097k), 2003-01-01
Supplement: esi.doc [file esi.doc]

Synthesis and Thermal Reactivity of Organoscandium and Yttrium Complexes of Sterically Less Bulky Salicylaldiminato Ligands.

**SUPPLEMENTARY EXPERIMENTAL SECTION**

**B303097K**

David J. H. Emslie, Warren E. Piers,* and Masood Parvez

Department of Chemistry, University of Calgary, 2500 University Drive, N.W, Calgary, Alberta, Canada, T2N 1N4.

Phone: 403-220-5746. FAX: 403-289-9488. email: [wpiers@ucalgary.ca](mailto:wpiers@ucalgary.ca). S. Robert Blair Professor of Chemistry (2000-2005); E.W.R. Steacie Memorial Fellow (2000-2003).

# See paper for preparation and characterisation of 1-ScPh, 3-ScPh, 4-ScMe, 5-ScPh, 6‑Sc, 6‑Y and 7-Y.

**N‑mesityl-*ortho*-*tert*-butylsalicylaldimine (HL3).** A mixture of *ortho*-*tert*-butylsalicylaldehyde (3.0 g, 16.8 mmol), 2,4,6-trimethylaniline (2.4 g, 17.8 mmol) and ZnCl2 (10 mg) in benzene (20 ml) was refluxed in a Dean-Stark apparatus for 12 hours. The resulting orange solution was evaporated to dryness *in vacuo*, filtered through silica gel in *n*-hexane, and evaporated to dryness *in vacuo* to give the product as a yellow oil which solidified after several weeks at room temperature. Yield 4.0 g (80 %). 1H‑ and 13C‑NMR data as reported by Bochmann *et al*.9

**[(L1)2Y(CH2SiMe2Ph)(THF)] (1-YPh).** Generated *in situ*: A solution of HL1 (15 mg, 58.7 mol) in d8-toluene (0.4 ml) was added to a solution of [Y(CH2SiMe2Ph)3(THF)2] (20 mg, 29.4 mol) in d8-toluene (0.2 ml) at –78˚C. The temperature was then raised to ‑20˚C for 1 hour, which resulted in complete conversion to the product. 1H-NMR (‑35˚C, d8-toluene):  7.83 (m, 2H, Ph), 7.74 {broad s, 2H, C*H*(NPh)}, 7.45-7.40 (m, 2H, Ph), 7.19-7.12 (m, 3H, Ph), 6.87-6.80 (m, 8H, Ph), 6.72 (m, 4H, Ph), 6.65 (t, 2H, *J* 8 Hz, Ph), 3.63 (broad s, 8H, THF), 1.52 (s, 18H, C*Me*3), 1.30 (broad s, 8H, THF), 0.42, 0.37 (s, 2 x 3H, Si*Me*2Ph), -0.14, -0.21 (d, 2 x 2H, YC*H*2). 13C{1H}-NMR (-35˚C, d8-toluene):  171.40 {s, *C*H(NPh)}, 165.61, 152.95 (b), 148.17, 140.22 (b), 123.87 (s, 5 quaternary aromatic), 135.60, 134.49, 133.26, 129.40, 127.77, 127.72, 126.33, 123.34, 117.66 (s, 9 Ph), 69.40 (s, THF), 35.75 (s, *C*Me3), 30.03 (s, C*Me*3), 25.85 (s, THF), 24.36 (d, 1*J*C,Y 43 Hz, Y*C*H2), 4.41, 3.29 (v.weak s, 2 Si*Me*2Ph).

**[(L2)2Sc(CH2SiMe2Ph)(THF)] (2-ScPh).** Generated *in situ*: A solution of HL2 (19 mg, 62.8 mol) in d8-toluene (0.4 ml) was added to a solution of [Sc(CH2SiMe2Ph)3(THF)2] (20 mg, 31.4 mol) in d8-toluene (0.2 ml) at –78˚C. The temperature was then raised to 10˚C for 1 hour, which resulted in complete conversion to the product. 1H-NMR (10˚C, d8-toluene):  7.9-7.4 (m, 2H, Ph), 7.42 {s, 2H, C*H*(NAr)}, 7.35 (broad s, 4H, Ph), 7.19 (broad s, 5H, Ph), 6.81 (broad s, 4H, Ph), 6.61 (m, 4H, Ph), 3.75 (broad s, 8H, THF), 3.04 (broad s, 2H, C*H*Me2), 1.39 (s, 8H, THF), 1.20 (broad s, 18H, C*Me*3), 0.96, 0.47 (s, 2 x 3H, CH*Me*2), 0.34, 0.28 (s, 2 x 3H, Si*Me*2Ph), 0.25, -0.17 (d, 2 x 1H, *J* 11 Hz, ScC*H*2). 13C{1H}-NMR spectrum not recorded due to appreciable decomposition after extended periods at 10˚C, and complex spectra due to multiple isomers at lower temperature.

**[(L2)2Y(CH2SiMe2Ph)(THF)] (2-YPh).** Generated *in situ*: A solution of HL2 (17 mg, 58.7 mol) in d8-toluene (0.4 ml) was added to a solution of [Y(CH2SiMe2Ph)3(THF)2] (20 mg, 29.4 mol) in d8-toluene (0.2 ml) at –78˚C. The temperature was then raised to 10˚C for 30 minutes to give the desired product. 1H-NMR (30˚C, d8-toluene):  7.89 (broad s, 2H, Ph), 7.75 {broad s, 2H, C*H*(NAr)}, 7.34 (broad m, 4H, Ph), 7.11 (m, 5H, Ph), 6.85 (broad s, 4H, Ph), 6.58 (broad s, 4H, Ph), 3.66 (broad s, 8H, THF), 3.034 (broad s, 2H, C*H*Me2), 1.40 (s, 8H, THF), 1.23 (broad s, 18H, C*Me*3), 0.99, 0.43 (broad s, 2 x 3H, CH*Me*2), 0.36, 0.30 (broad s, 2 x 3H, Si*Me*2Ph), 0.0 to –2.0 (broad m, 2H, YC*H*2). 13C{1H}-NMR spectrum not recorded due to rapid decomposition at 30˚C and complex spectra due to multiple isomers at lower temperature.

**[(L3)2Y(CH2SiMe3)(THF)] (3-YMe).** A mixture of [YCl3(THF)3] (300 mg, 0.67 mmol) and LiCH2SiMe3 (189 mg, 2.01 mmol) in *n*-hexane (20 ml) was stirred for 2 h at 0˚C and then filtered to give a colourless solution of [Y(CH2SiMe3)3(THF)2]. After cooling to ‑78˚C, a solution of HL3 (396 mg, 1.34 mmol) in *n*‑hexane (4 ml) was added, the mixture was warmed to -20˚C for 2 h, cooled to –78˚C, and filtered on a pre-cooled frit to collect a cream solid which was washed with cold *n*‑hexane (x2) and dried *in vacuo* (20 min). Yield 389 mg (69 %). 1H-NMR of major isomer (-40˚C, d8-toluene): 7.71, 7.67 {d, 2 x 1H, C*H*(NMs)}, 7.41 (t, 2H, *J* 6 Hz, Ph), 6.84 (s, 1H, Ph), 6.78 (t, 2H, *J* 8 Hz, Ph), 6.70 (s, 1H, Ph), 6.67 (t, 1H, *J* 8 Hz, Ph), 6.62 (t, 1H, *J* 8 Hz, Ph), 6.43, 6.37 (s, 2 x 1H, Ph), 3.93-3.87 (m, 4H, THF), 2.47, 2.19, 2.15, 2.00, 1.91, 1.77 (s, 6 x 3H, C6H2*Me*3), 1.36, 1.29 (s, 2 x 9H, C*Me*3), 1.19 (m, 4H, THF), 0.34 (s, 9H, Si*Me*3), -0.29, ‑0.58 (dd, 1H, 2*J*H,H 11 Hz,  2*J*Y,H 3 Hz, YC*H*2). 1H-NMR of minor isomers (-40˚C, d8-toluene): ‑0.82, ‑1.41 {dd, 1H, 2*J*H,H 12 Hz, YC*H*2 of minor isomer A (2% of mixture)}; ‑1.04, ‑1.48 {dd, 1H, 2*J*H,H 12 Hz, YC*H*2 of minor isomer B (2% of mixture)}. 13C{1H}-NMR of major isomer (-40˚C, d8-toluene):  175.39, 173.85 {s, 2 *C*H(NMs)}, 166.51, 165.45, 150.29, 148.91, 140.77, 138.87, 134.74, 134.13, 131.23, 131.10, 124.02, 123.43 (s, 12 quaternary aromatic), 135.75, 134.89, 133.52, 132.64, 130.15, 130.03, 29.71, 129.26, 115.69, 115.56 (s, 10 Ph), 70.90, 67.90 (s, 2 THF), 35.27, 35.17 (s, 2 *C*Me3), 29.71, 29.50 (s, 2 C*Me*3), 25.60 (broad s, THF), 27.18 (d, J ~ 43 Hz, Y*C*H2), 20.82 (s, 2 x C6H2*Me*3), 19.97, 19.52, 19.40, 18.43 (s, 4 x C6H2*Me*3), 5.07 (s, Si*Me*3). Anal. Calcd. for C48H67N2O3SiY: C, 68.87; H, 8.07; N, 3.35. Found: C, 68.79; H, 8.21; N, 3.27 %.

**[(L3)2Y(CH2SiMe2Ph)(THF)] (3-YPh).** A solution of HL3 (173 mg, 588 mol) in *n*‑hexane (4 ml) was added to [Y(CH2SiMe2Ph)3(THF)2] (200 mg, 294 mol) in *n*‑hexane (20 ml) at -78˚C. The solution was then warmed to -20˚C for 4 h, and filtered on a pre-cooled frit to collect a pale-pink solid which was washed with cold *n*‑hexane (x2). Yield 198 mg (75 %). 1H-NMR of major isomer (-40˚C, d8-toluene):  7.86 (d, 2H, *J* 6 Hz, Ph), 7.69 {s, 2H, C*H*(NMs)}, 7.43 (d, 2H, *J* 7 Hz, Ph), 7.22-7.17 (m, 3H, Ph), 6.81-6.63 (m, 6H, Ph), 6.44, 6.38 (s, 2 x 1H, Ph), 3.86, 3.76 (m, 2 x 2H, THF), 2.29, 2.15, 2.14, 1.96 (s, 4 x 3H, *o*‑C6H2*Me*3), 1.88, 1.78 (s, 2 x 3H, *p*-C6H2*Me*3), 1.40, 1.27 (s, 2 x 9H, C*Me*3), 1.18, 1.08 (m, 2 x 2H, THF), 0.43 (s, 6H, Si*Me*2Ph), -0.11, ‑0.39 (dd, 2 x 1H, 2*J*H,H 11 Hz,  2*J*Y,H 2 Hz, YC*H*2). 1H-NMR of minor isomers (-40˚C, d8-toluene): -0.89, ‑1.41 {dd, 1H, 2*J*H,H 12 Hz, YC*H*2 of minor isomer A (6% of mixture)}; -0.69, -1.25 {dd, 1H, 2*J*H,H 12 Hz, YC*H*2 of minor isomer B (2% of mixture)}. 13C{1H}-NMR of major isomer (-40˚C, d8-toluene):  175.41, 173.94 {s, 2 *C*H(NMs)}, 166.42, 165.39, 150.31, 148.79, 148.06, 140.69, 138.90, 134.71, 134.11, 131.12, 131.00, 130.32, 124.08, 123.42 (s, 14 quaternary aromatic), 135.79, 134.88, 134.22, 133.55, 132.70, 130.12, 130.00, 129.62, 129.22, 127.48, 125.45, 115.75, 115.60 (s, 13 Ph), 70.85 (s, THF), 35.25, 35.18 (2 *C*Me3), 29.71, 29.48 (s, 2 C*Me*3), 25.31 (s, THF), 23.50 (d, J ~ 46 Hz, Y*C*H2), 20.73 (s, 2 x C6H2*Me*3), 19.77, 19.49, 19.38, 18.36 (s, 4 C6H2*Me*3), 4.20, 2.82 (s, 2 Si*Me*2Ph). Anal. Calcd. for C53H69N2O3SiY: C, 70.80; H,7.74; N, 3.12. Found: C, 68.16; H, 7.89; N, 2.85 %.15

**[(L1)Sc{(tBuC6H3O)CH(CH2SiMe2Ph)-NPh}(THF)], 4-ScPh.** A solution of HL1 (239 mg, 0.94 mmol) in *n*-hexane (4 ml) was added to [Sc(CH2SiMe2Ph)3(THF)2] (300 mg, 0.47 mmol) in *n*‑hexane (10 ml) at -78˚C. The temperature was then increased to 0˚C for 2 h, then RT for 16h before the mixture was cooled to ‑45˚C and filtered to collect a brick-red solid. Yield 280 mg (84 %). 1H-NMR (C6D6):  7.88 {s, 1H, C*H*(NPh)}, 7.47-7.41 (m, 3H, Ph), 7.28-7.10 (m, 6H, Ph), 7.05-6.85 (m, 7H, Ph), 6.79 (d, 2H, *J* 8 Hz, Ph), 6.72-6.65 (m, 2H, Ph), 6.62 (t, 1H, *J* 7 Hz, Ph), 4.67 (dd, 1H, 3*J*H,H 12, 2 Hz, C*H*CH2), 3.53 (m, 4H, THF), 1.75 (dd, 1H, 2*J*H,H 11, 3*J*H,H 12 Hz, CHC*H*2), 1.61, 1.42 (s, 2 x 9H, C*Me*3), 1.36 (dd, 1H, 2*J*H,H 11, 3*J*H,H 2 Hz, CHC*H*2), 0.96 (m, 4H, THF), 0.24, 0.00 (s, 2 x 3H, Si*Me*2Ph). 13C{1H}-NMR (C6D6):  170.68 {s, *C*H(NPh)}, 164.86, 161.36, 155.25, 151.09, 140.57, 140.20, 136.96, 135.10, 123.71 (s, 9 quaternary aromatic), 134.45, 134.04, 133.59, 129.56, 129.41, 128.82, 127.89, 127.55, 126.70, 125.33, 122.66, 117.58, 116.90, 114.60, 113.88 (s, 15 Ph), 71.40 (s, THF), 61.98 (s, *C*HCH2), 35.28, 35.24 (s, 2 *C*Me3), 30.59, 29.53 (s, 2 C*Me*3), 24.85 (s, THF), 24.71 (s, CH*C*H2), -2.25, -3.19 (s, 2 Si*Me*2Ph). Anal. Calcd. for C47H57N2O3SiSc: C, 73.22; H, 7.45; N, 3.63 %. Found: C, 72.70; H, 7.18; N, 3.78 %.

**[(L1)Y{(tBuC6H3O)CH(CH2SiMe2Ph)-NPh}(THF)2], 4-YPh.** A solution of HL1 (149 mg, 0.59 mmol) in *n*-hexane (4 ml) was added to a solution of [Y(CH2SiMe2Ph)3(THF)2] (200 mg, 0.29 mmol) in *n*-hexane (20 ml) at -78˚C. The solution was then stirred at ‑20˚C for 2 h and RT for 12h before evaporation to low volume *in vacuo*, sonication, cooling to –78˚C, and filtration to collect an orange solid. Yield 163 mg (62 %). Crystals of **4‑YPh·1.5 toluene** were grown by cooling a concentrated solution of **4-YPh** in toluene to –35˚C. 1H-NMR (C6D6):  7.96 {s, 1H, C*H*(NPh)}, 7.50-7.44 (m, 3H, Ph), 7.30-7.03 (m, 13H, Ph), 7.00-6.95 (m, 2H, Ph), 6.76 (t, 1H, *J* 7 Hz, Ph), 6.65 (t, 1H, *J* 8 Hz, Ph), 6.59 (t, 1H, *J* 7 Hz, Ph), 4.75 (dd, 1H, 3*J*H,H 12, 2 Hz, C*H*CH2), 3.59 (m, 8H, THF), 2.06 (dd, 1H, 2*J*H,H 12, 3*J*H,H 12 Hz, CHC*H*2), 1.66 (dd, 1H, 2*J*H,H 12, 3*J*H,H 2 Hz, CHC*H*2), 1.63, 1.42 (s, 2 x 9H, C*Me*3), 1.01 (m, 8H, THF), 0.32, 0.00 (s, 2 x 3H, Si*Me*2Ph). 13C{1H}-NMR (C6D6):  171.55 {s, *C*H(NPh)}, 167.01, 163.13, 157.36, 152.56, 141.60, 140.39, 136.69, 136.03, 123.69 (s, 9 quaternary aromatic), 135.73, 134.08, 133.33, 129.71, 129.62, 128.58, 128.29, 127.81, 126.47, 125.00, 122.59, 115.48, 115.28, 114.11, 112.51 (s, 15 Ph), 70.60 (s, THF), 62.80 (v.weak s, *C*HCH2), 35.47, 35.13 (s, 2 *C*Me3), 30.34, 29.93 (s, C*Me*3), 24.91 (s, THF), 26.13 (v.weak s, CH*C*H2), -2.71, -2.96 (s, 2 Si*Me*2Ph). Anal. Calcd. for C51H65N2O4SiY: C, 69.05; H, 7.39; N, 3.16. Found: C, 66.79; H, 7.41; N, 2.98 %.15

**[(L2)Y{(tBuC6H3O)CH(CH2SiMe2Ph)-NC6H4iPr-2}(THF)2], 5-YPh.** A solution of bright yellow [(L2)2Y(CH2SiMe2Ph)(THF)] (**2-YPh**) in d8‑toluene (0.6 ml) was generated as described above, and allowed to stand at room temperature for 5 days. The resulting orange solution of **5-YPh** was evaporated to dryness *in vacuo* to give a red-orange oil. The product was not isolated as a solid. 1H-NMR (C6D6):  7.83 {s, 1H, C*H*(NAr)}, 7.47-7.40 (m, 1H, Ph), 7.37-7.34 (m, 2H, Ph), 7.31 (m, 2H, Ph), 7.2-7.1 (m, 4H, Ph), 7.1-7.0 (m, 4H, Ph) 7.1-7.0 (m, 4H, Ph), 6.90 (m, 4H, Ph), 6.70 (t, 1H, *J* 8 Hz, Ph), 6.61 (t, 1H, *J* 8 Hz, Ph), 4.29 (broad d, 1H, *J* 12 Hz, C*H*CH2), 3.58 (s, 8H, THF), 2.92 (septet, 2H, *J* 7 Hz, C*H*Me2), 2.00 (broad s, 1H, CHC*H*2), 1.61, 1.50 (s, 2 x 9H, C*Me*3), 1.40, 1.21, 1.08, 0.97 (d, 4 x 3H, *J* 7 Hz, CH*Me*2), 1.67 (broad s, 1H, CHC*H*2), 1.12 (m, 8H, THF), 0.08, -0.02 (s, 2 x 3H, Si*Me*2Ph). 13C{1H}-NMR (C6D6):  174.80 {s, *C*H(NAr)}, 167.45, 163.1, 156.25, 151.48, 141.51, 140.93, 140.24, 137.6, 137.4, 123.41, 120.0 (s, 11 quaternary aromatic), 135.72, 134.73, 133.73, 128.68, 128.23, 128.05, 127.58, 127.50, 127.06, 126.87, 126.72, 126.59, 125.54, 124.90, 116.03, 115.66 (s, 16 Ph), 70.89 (s, THF), 69.0 (broad s, *C*HCH2), 35.77, 35.72 (s, 2 *C*Me3), 30.76, 30.36 (s, 2 C*Me*3), 27.99, 25.60, 25.46 (s, 3 CH*Me*2), 25.34 (s, THF), 24.74 (broad s, CH*C*H2), ‑1.17, ‑2.99 (s, 2 Si*Me*2Ph).
